# Supplementary material for: Assessing the time intervals between economic recessions
Source: PLOS journal article supplement (doi:10.1371/journal.pone.0232615), 2020-05-07
Supplement: S2 (10.1371/journal.pone.0232615.s002) [file journal.pone.0232615.s002]

**Table 3.** U.S. Recessions. National Bureau of Economic Research - NBER data.

| #  | Peak month     | Through month | #  | Peak month    | Through month |
|----|----------------|---------------|----|---------------|---------------|
| 0  | ***            | December 1854 | 17 | January 1920  | July 1921     |
| 1  | June 1857      | December 1858 | 18 | May 1923      | July 1924     |
| 2  | October 1860   | June 1861     | 19 | October 1926  | November 1927 |
| 3  | April 1865     | December 1867 | 20 | August 1929   | March 1933    |
| 4  | June 1869      | December 1870 | 21 | May 1937      | June 1938     |
| 5  | October 1873   | March 1879    | 22 | February 1945 | October 1945  |
| 6  | March 1882     | May 1885      | 23 | November 1948 | October 1949  |
| 7  | March 1887     | April 1888    | 24 | July 1953     | May 1954      |
| 8  | July 1890      | May 1891      | 25 | August 1957   | April 1958    |
| 9  | January 1893   | June 1894     | 26 | April 1960    | February 1961 |
| 10 | December 1895  | June 1897     | 27 | December 1969 | November 1970 |
| 11 | June 1899      | December 1900 | 28 | November 1973 | March 1975    |
| 12 | September 1902 | August 1904   | 29 | January 1980  | July 1980     |
| 13 | May 1907       | June 1908     | 30 | July 1981     | November 1982 |
| 14 | January 1910   | January 1912  | 31 | July 1990     | March 1991    |
| 15 | January 1913   | December 1914 | 32 | March 2001    | November 2001 |
| 16 | August 1918    | March 1919    | 33 | December 2007 | June 2009     |
